# Supplementary material for: Molecular Characterization of Respiratory Syncytial Virus in Children With Repeated Infections With Subgroup B in the Philippines
Source: PubMed Central journal article supplement — J Infect Dis. 2018 May 2;218(7):1045–53. doi: 10.1093/infdis/jiy256 (PMC6107742; doi:10.1093/infdis/jiy256), 2018-05-02
Supplement: jiy256_suppl_supplementary_figure_1.pdf [file jiy256_suppl_supplementary_figure_1.pdf]

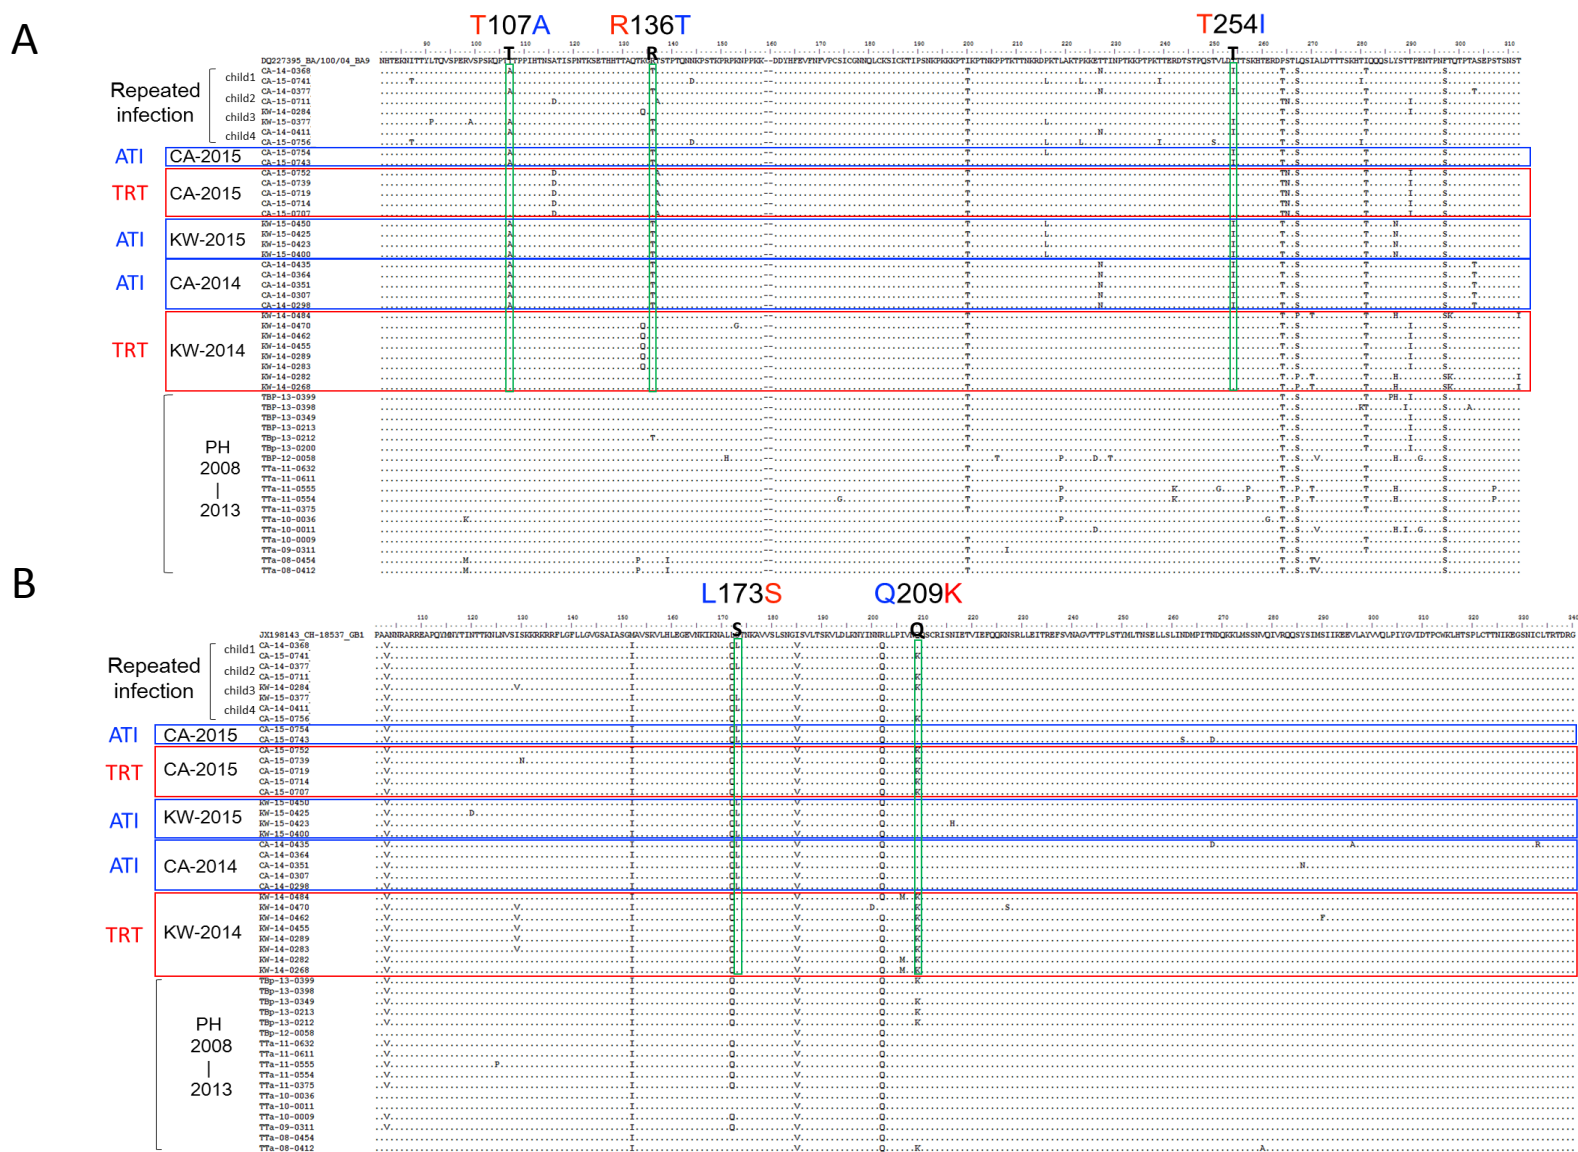

**Supplementary Figure 1. Deduced amino acid sequences of G protein (A) and F protein (B) of RSV-B detected in the Philippines.** The amino acid sequences corresponding to position 81 to 312 of the G protein and 101 to 340 of the F protein were aligned with the BA/100/04 (DQ227395) and CH-18537 (JX198143), respectively. Positions of the characteristic amino acid substitution in 2014 and 2015 are enclosed in cyan open boxes. RSV-B of ATI cluster with characteristic pattern of amino acid substitutions of A107, T136, I254 in the G protein and L173, Q209 in the F protein are enclosed in blue open boxes, while TRT viruses with T107, R136, T254 in the G protein and S173, Q209 in the F protein are enclosed in red open boxes. The strain CA (Caibiran) and KW (Kawayan) were detected in this study while PH 2008-2013 were detected in the previous study in the Philippines.
