# Supplementary material for: Molecular Characterization of Respiratory Syncytial Virus in Children With Repeated Infections With Subgroup B in the Philippines
Source: PubMed Central journal article supplement — J Infect Dis. 2018 May 2;218(7):1045–53. doi: 10.1093/infdis/jiy256 (PMC6107742; doi:10.1093/infdis/jiy256), 2018-05-02
Supplement: jiy256_suppl_supplementary_figure_2.pdf [file jiy256_suppl_supplementary_figure_2.pdf]

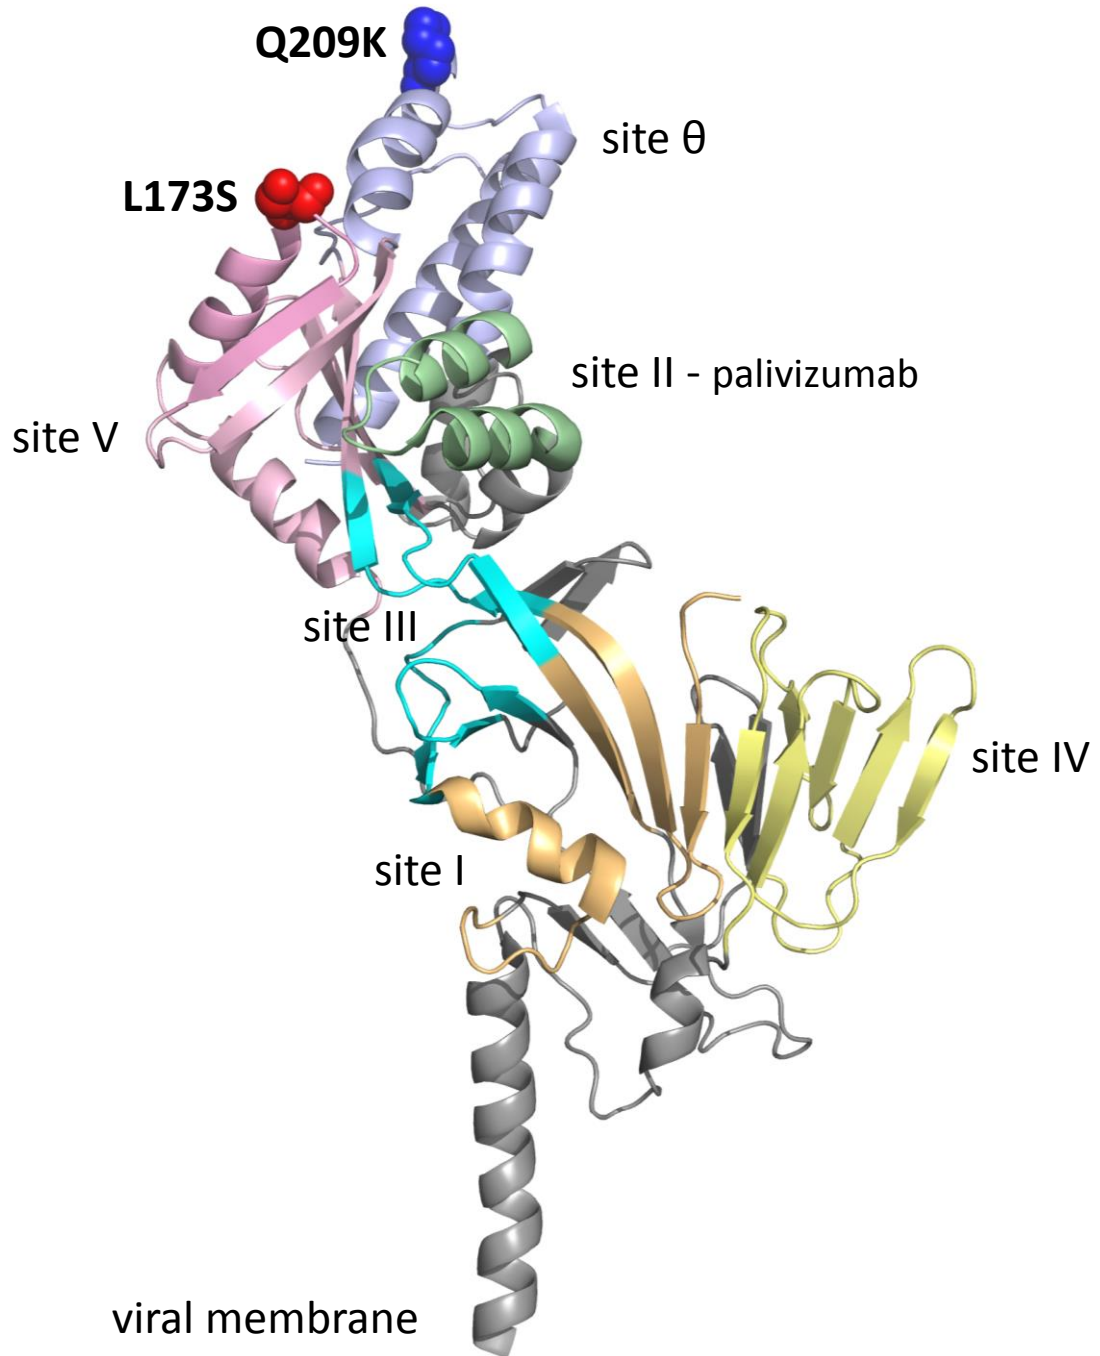

**Supplementary Figure 2. Amino acid substitutions in the F protein of RSV-B that caused homologous reinfections in the Philippines.** Amino acid substitutions in the F protein of RSV-B that caused homologous reinfections in the Philippines were mapped on the monomeric 3D structure of the prefusion F protein (PDB ID: 4JHW). Antigenic sites are labelled with site  $\theta$  in light blue, site I in orange, site II in green, site III in cyan, site IV in yellow, and site V in pink [20]. The Q209K substitution (blue) is located in antigenic site  $\theta$  while the L173S substitution (red) is located in antigenic site V.
